# Supplementary material for: Horizontal equity in health care utilization in Brazil, 1998–2008
Source: Springer Nature journal article supplement (doi:10.1186/1475-9276-11-33), 2012-01-01

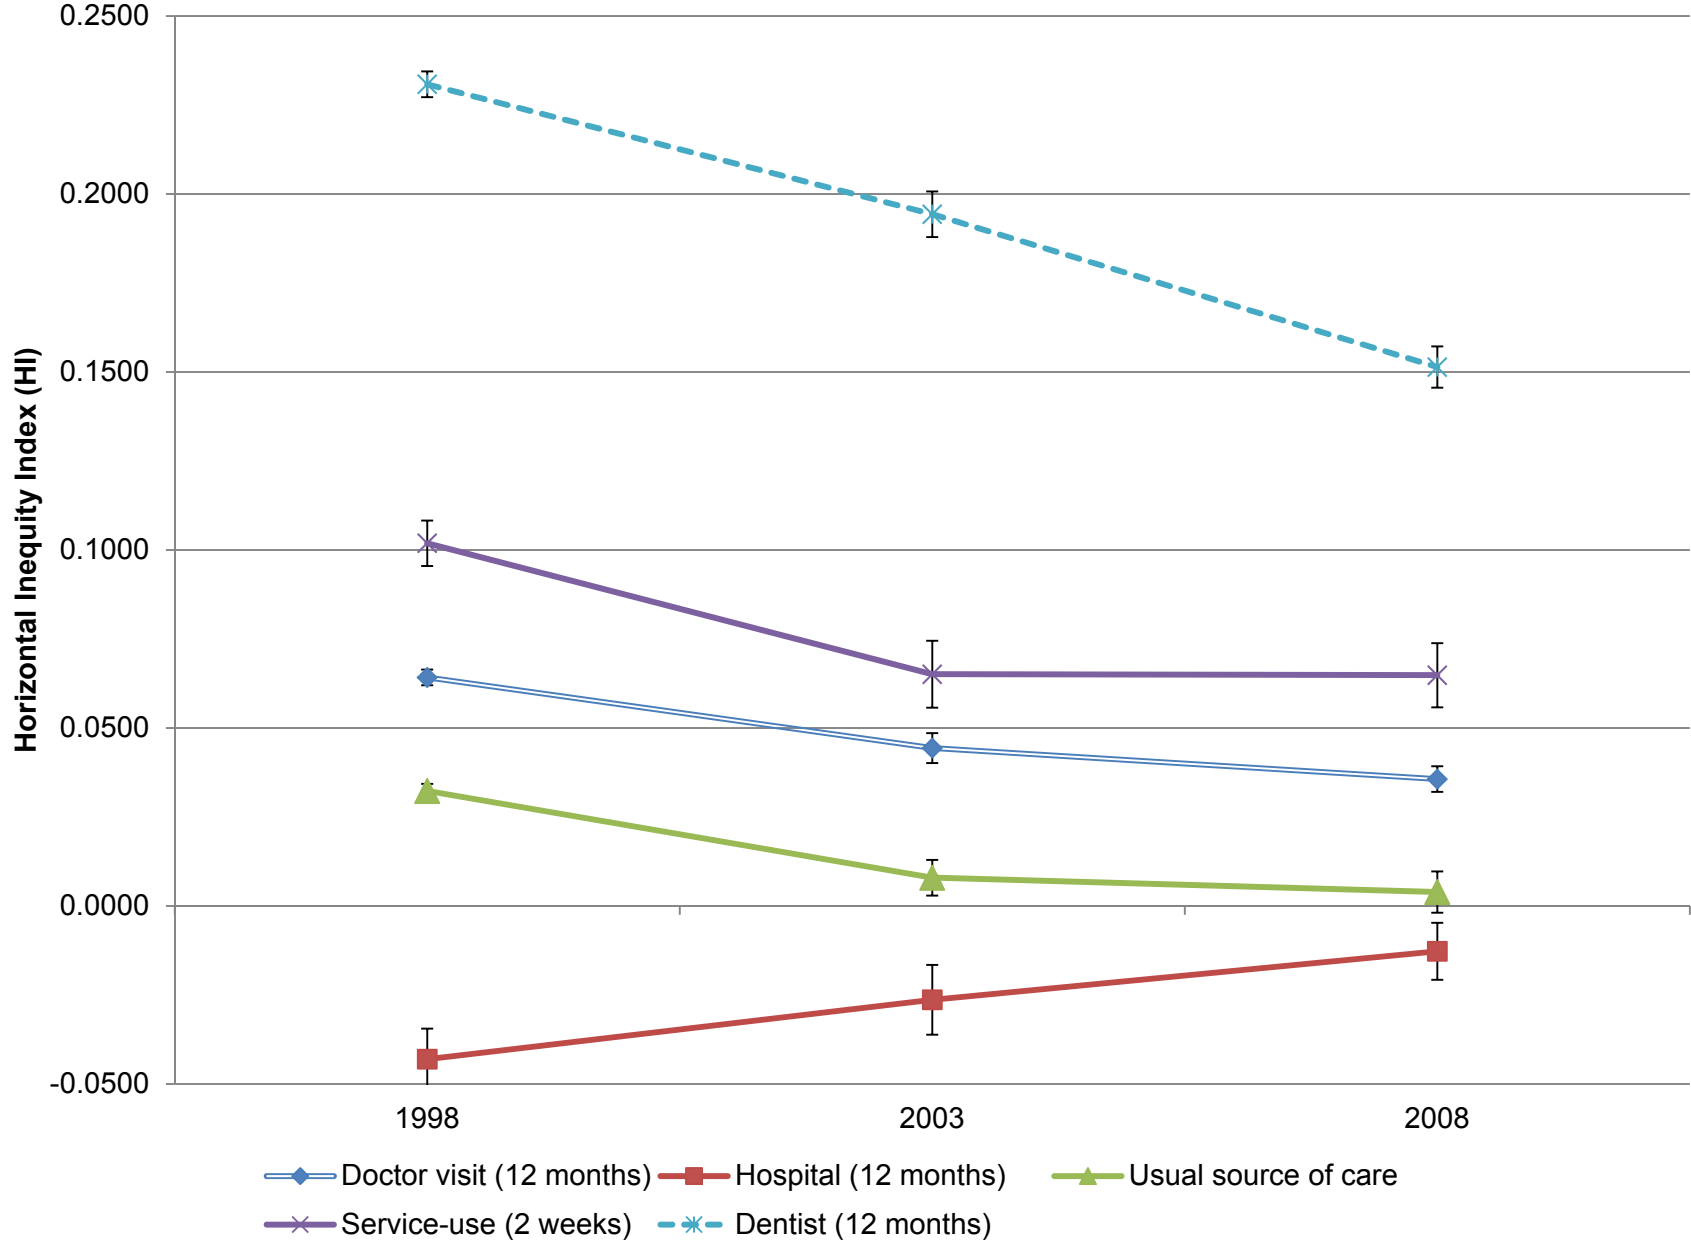

Supplement: 12939_2012_282_MOESM2_ESM.pdf [file 12939_2012_282_MOESM2_ESM.pdf]
